# Supplementary material
Source: PubMed Central journal article supplement (PMC6157366)
Supplement: Supp_Table1.pdf [file Supp_Table1.pdf]

SUPPLEMENTARY TABLE S1. ASSOCIATION OF THYROID ANTIBODIES WITH AFC  
AS STRATIFIED BY INFERTILITY DIAGNOSIS

|                             | <i>AFC</i>             |                 |                            |                |
|-----------------------------|------------------------|-----------------|----------------------------|----------------|
|                             | <i>Full trajectory</i> |                 | <i>Closest measurement</i> |                |
|                             | <i>Mean difference</i> | <i>[95% CI]</i> | <i>Mean difference</i>     | <i>(SE)</i>    |
| <i>TPOAb positivity</i>     |                        |                 |                            |                |
| Unexplained                 | -2.2                   | [-4.3 to 0.5]   | -2.1                       | (-3.9 to 0.0)  |
| Diminished ovarian reserve  | -1.6                   | [-3.8 to 1.9]   | -1.3                       | (-3.2 to 1.7)  |
| Endometriosis/tubal/uterine | 2.7                    | [-1.0 to 8.0]   | 3.8                        | (0.4 to 8.1)   |
| Male factor                 | 4.6                    | [1.2 to 8.9]    | 5.1                        | (2.7 to 7.9)   |
| Ovulation disorders         | -7.4                   | [-12.4 to 2.5]  | -5.9                       | (-10.5 to 0.7) |
| <i>TgAb positivity</i>      |                        |                 |                            |                |
| Unexplained                 | 0.5                    | [-2.5 to 4.3]   | 1.0                        | (-1.3 to 3.9)  |
| Diminished ovarian reserve  | -1.7                   | [-3.9 to 2.0]   | -2.5                       | (-3.9 to -0.3) |
| Endometriosis/tubal/uterine | 4.6                    | [0.4 to 10.2]   | 4.3                        | (1.2 to 8.2)   |
| Male factor                 | 4.8                    | [1.4 to 9.1]    | 5.2                        | (2.8 to 8.0)   |
| Ovulation disorders         | 9.6                    | [-3.9 to 37]    | 8.2                        | (0.2 to 19.3)  |

AFC, antral follicle count; CI, confidence interval; SE, standard error.
